# Supplementary material for: Triterpenoids from Vitellaria paradoxa Stem Barks Reduce Nitrite Levels in LPS-Stimulated Macrophages
Source: MDPI journal article supplement (doi:10.3390/plants10051006), 2021-05-18
Supplement: s1 [file s1]

## SUPPLEMENTARY MATERIAL

### Triterpenoids from *Vitellaria paradoxa* Stem Barks Reduce Nitrite Levels in LPS-Stimulated Macrophages

Carmina Sirignano <sup>1</sup>, Pascal Nadembega <sup>2</sup>, Ferruccio Poli <sup>3</sup>, Barbara Romano <sup>1</sup>,  
Giuseppe Lucariello <sup>1</sup>, Daniela Rigano <sup>1,\*</sup>, and Orazio Taglialatela-Scafati <sup>1</sup>

<sup>1</sup> Department of Pharmacy, School of Medicine and Surgery, University of Naples Federico II, Via Domenico Montesano 49, 80131 Naples, Italy.; [carmina.sirignano@unina.it](mailto:carmina.sirignano@unina.it) (C.S.); [barbara.romano@unina.it](mailto:barbara.romano@unina.it) (B.R.); [giuseppe.lucariello@unina.it](mailto:giuseppe.lucariello@unina.it) (G.L.); [drigano@unina.it](mailto:drigano@unina.it) (D.R.); [scatagli@unina.it](mailto:scatagli@unina.it) (O.T.S.)

<sup>2</sup> University of Ouagadougou UFR/SVT, 03 BP, 848 Ouagadougou 03, Burkina Faso; [pascal.nadembega@gmail.com](mailto:pascal.nadembega@gmail.com)

<sup>3</sup> Department of Pharmacy and Biotechnology, University of Bologna, Via Imerio, 42, 40126, Bologna, Italy; [ferruccio.poli@unibo.it](mailto:ferruccio.poli@unibo.it)

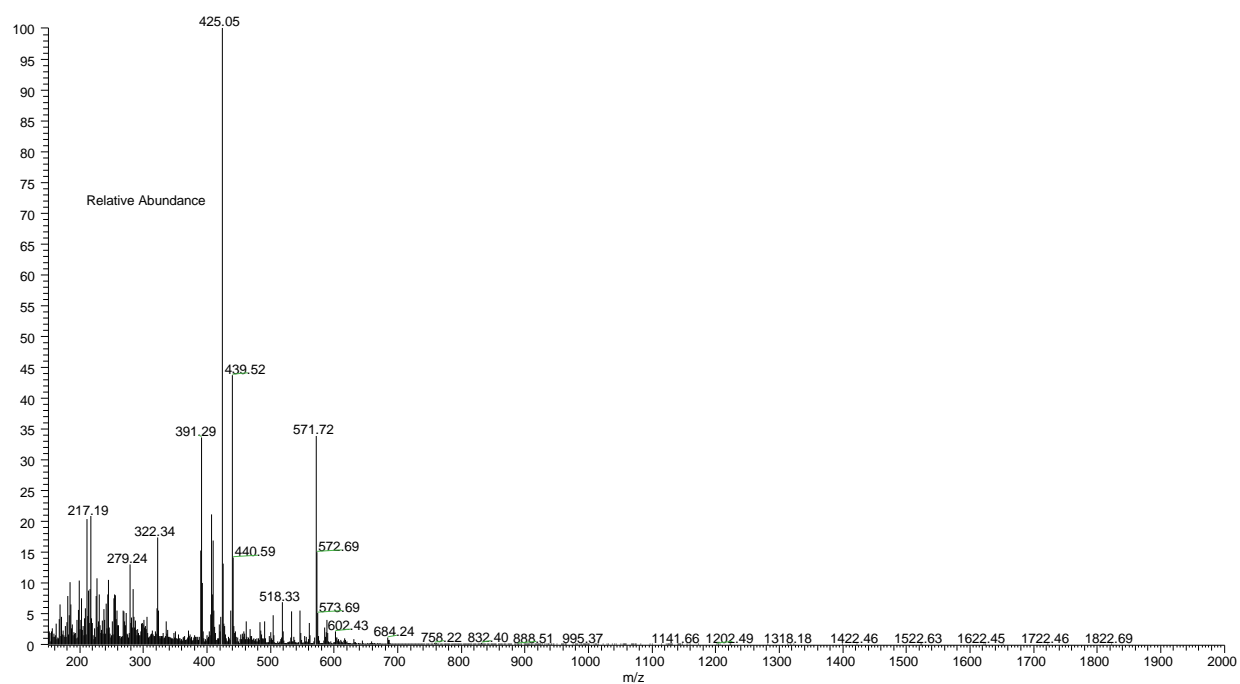

**Figure S1.** Negative ion MS of lupeol (**1**)

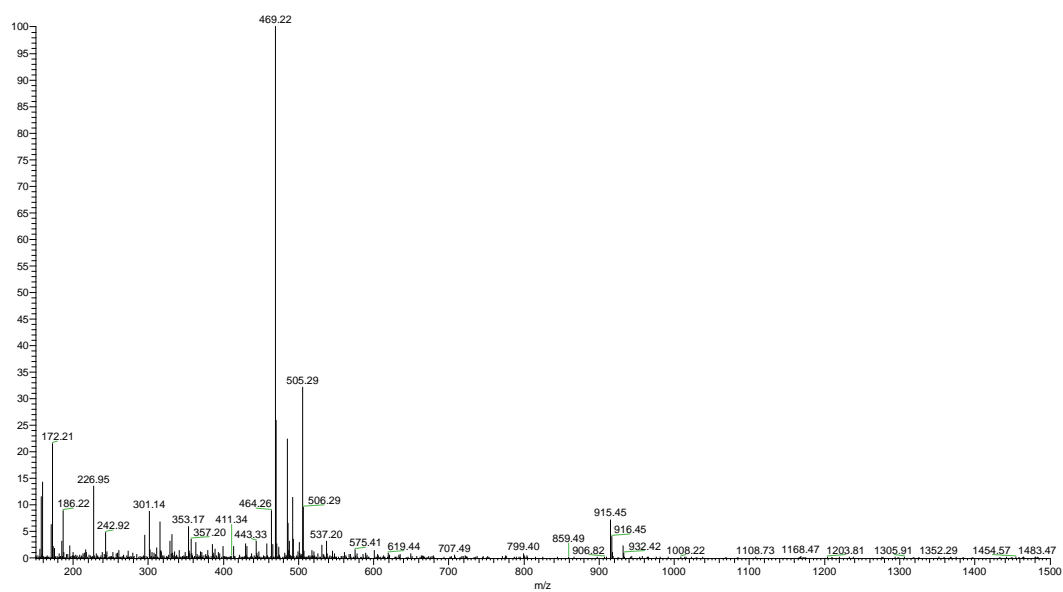

**Figure S2.** Positive ion MS of lupeol acetate (**2**)

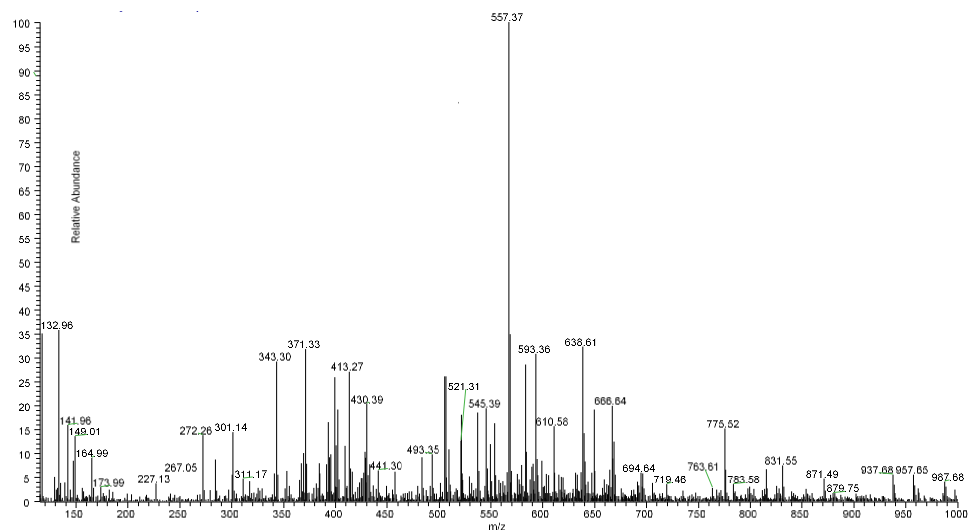

**Figure S3.** Positive ion MS of lupeol cinnamate (3)

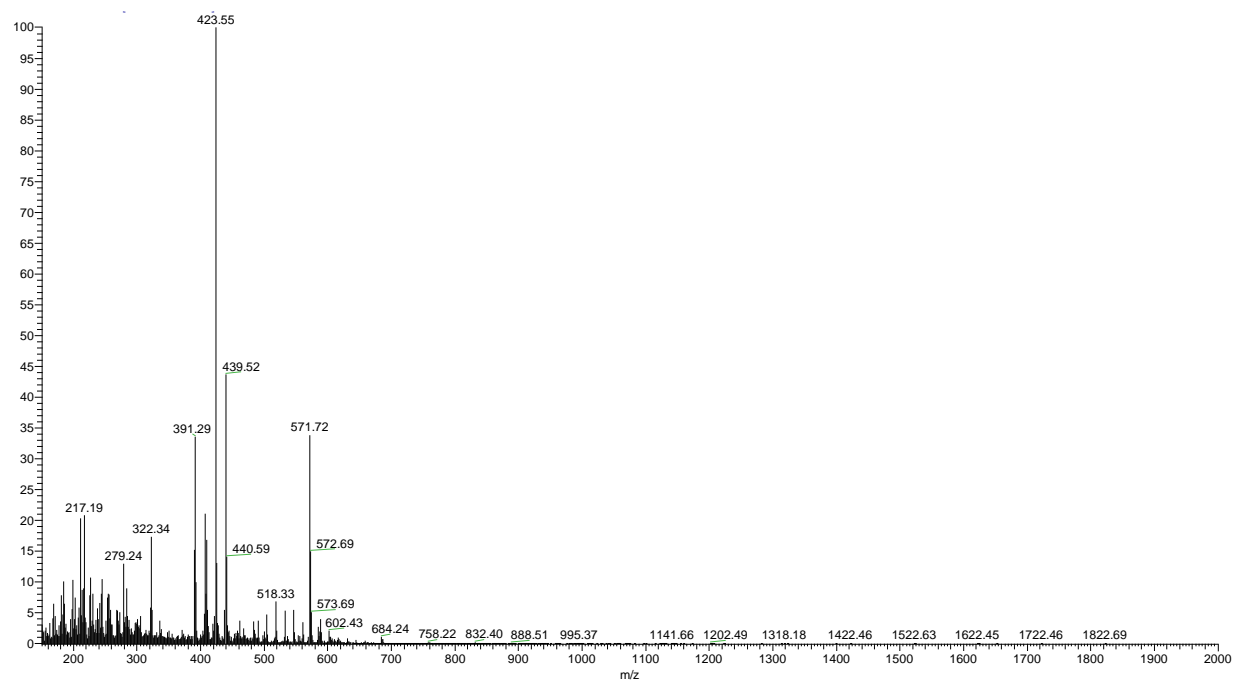

**Figure S4.** Negative ion MS of lupenone (4)

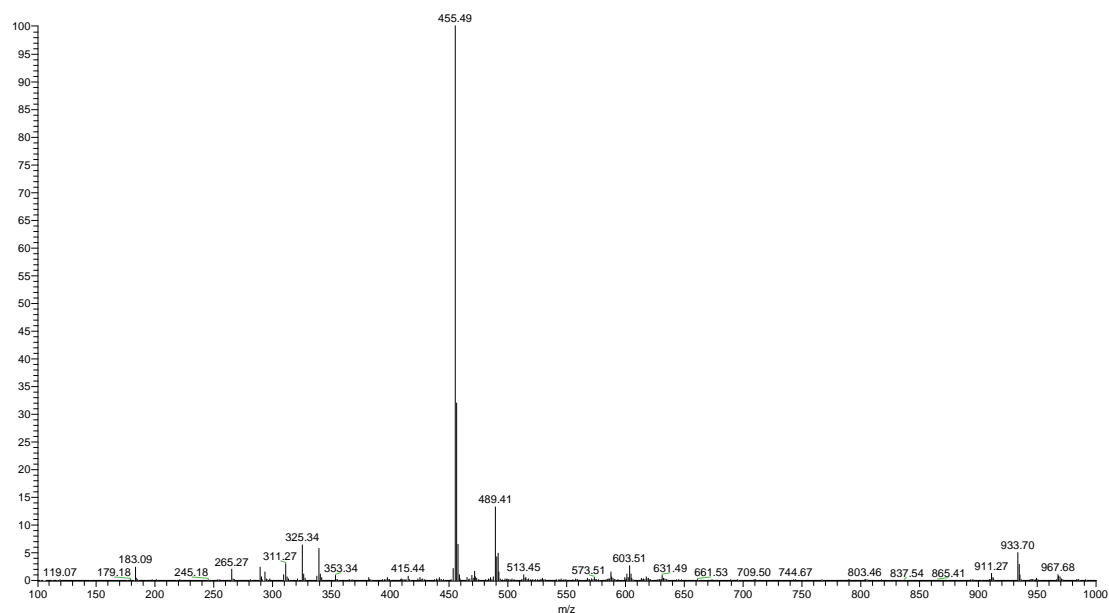

**Figure S5.** Negative ion MS of betulinic acid (5)

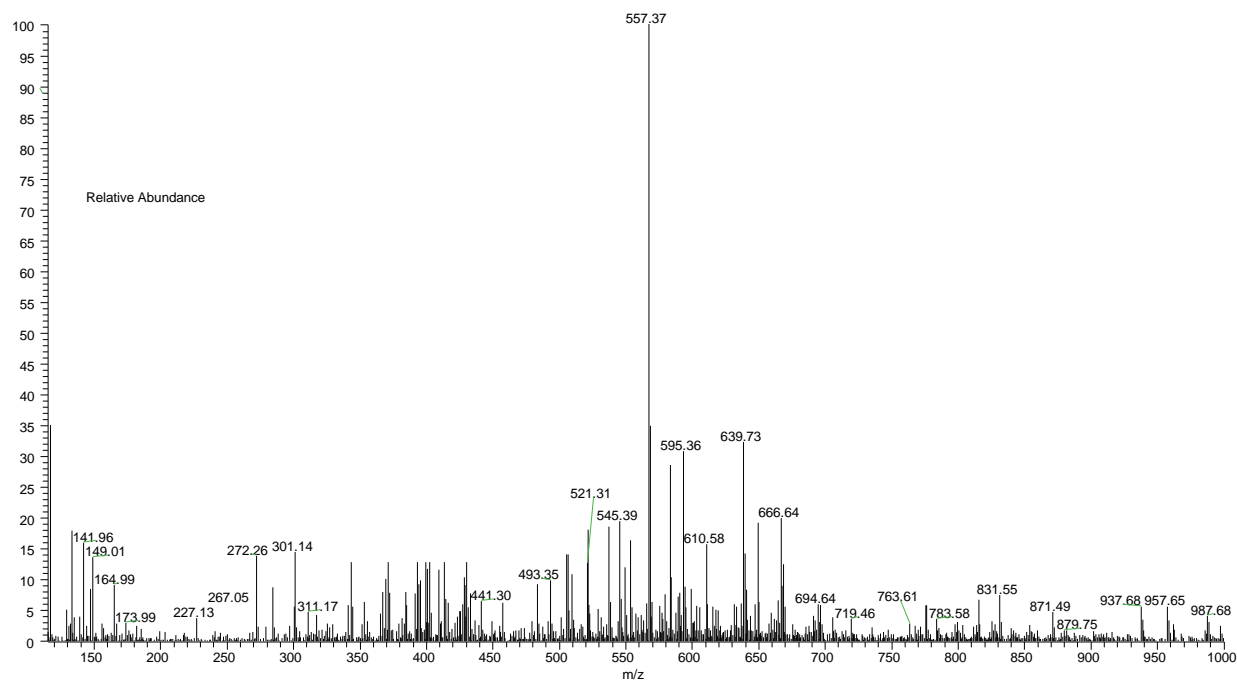

**Figure S6.** Positive ion MS of  $\alpha$ -amyrin cinnamate (6)

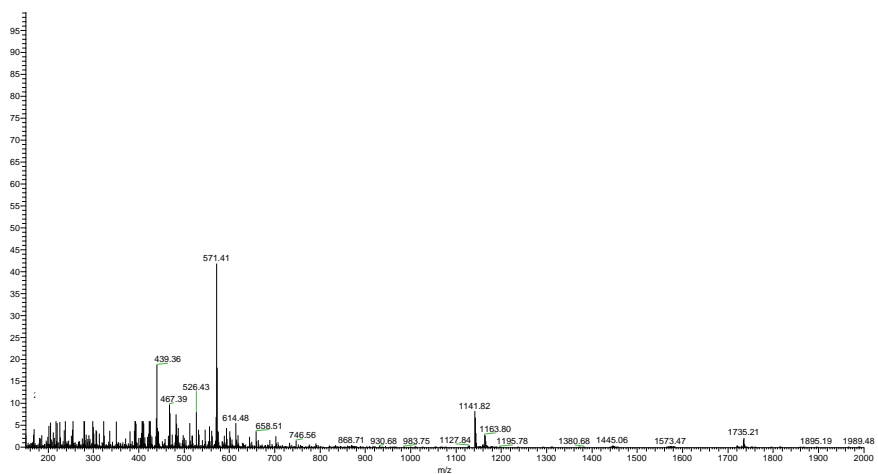

**Figure S7.** Positive ion MS of ursaldehyde cinnamate (7)

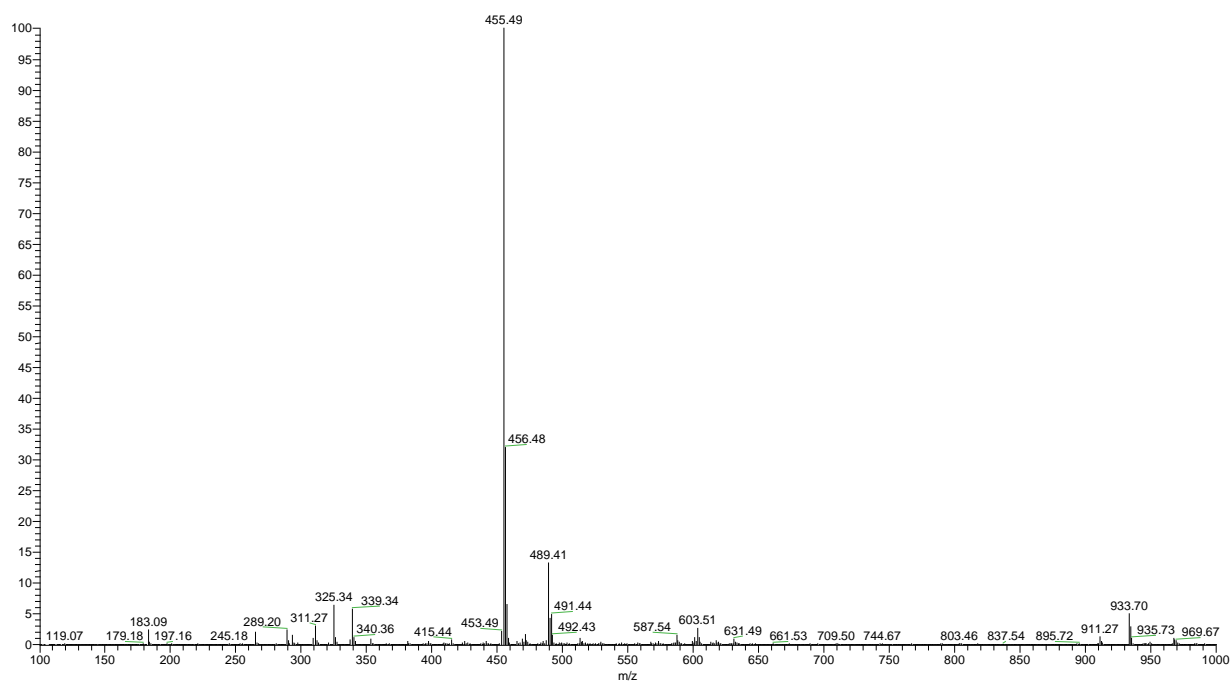

**Figure S8.** Negative ion MS of ursolic acid (8)

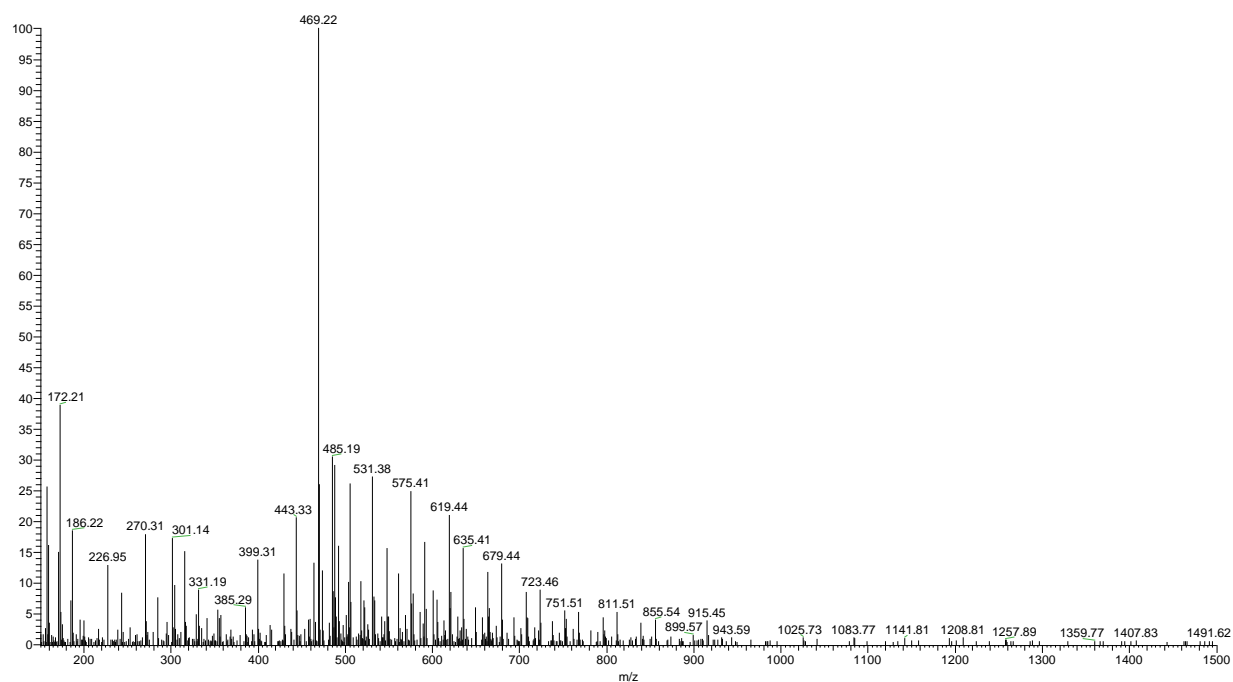

**Figure S9.** Positive ion MS of  $\beta$ -amyrin acetate (**9**)

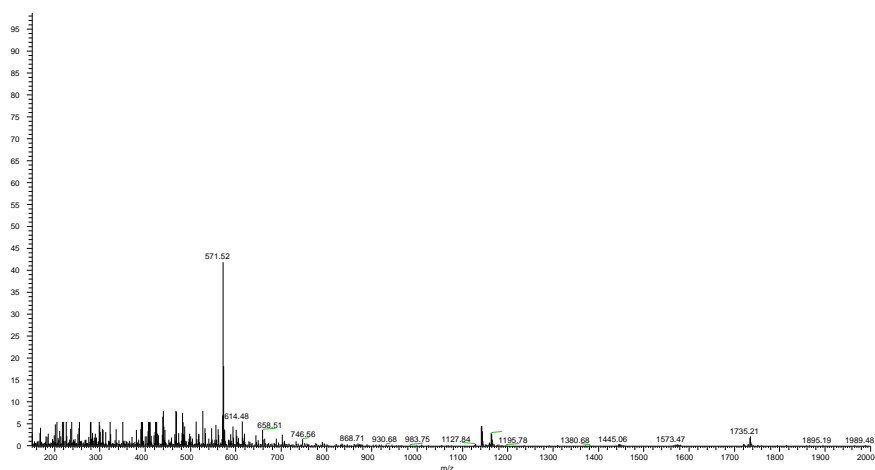

**Figure S10.** Negative ion MS of 11-hydroxy- $\beta$ -amyrin cinnamate (**10**)
